# Supplementary material
Source: PubMed Central journal article supplement (PMC6399500)
Supplement: 10.1194_M089722_jlr.M089722-1.pdf [file 10.1194_M089722_jlr.M089722-1.pdf]

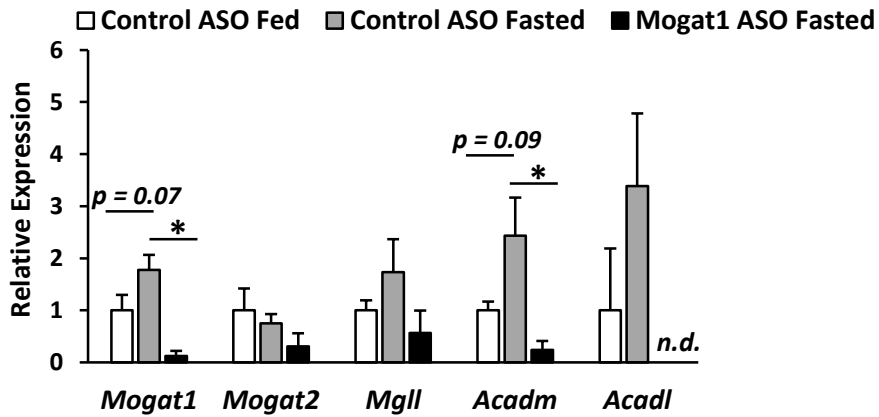

**Supplemental Figure 1- Changes in gene expression in mice following *Mogat1* ASO treatment.** Male C57bl/6J mice were injected (IP) twice-weekly with ASO's targeted against *Mogat1* (5'-TGGCCACGTGGAGATACGAT-3' (20-mer)) or scramble control (50 mg/kg) for three weeks prior to fast (24 h) and liver harvest. **A:** Fasting mice receiving *Mogat1* ASO had significantly lower *Mogat1*, and *Acadm*, and no detectable expression of *Acadl* during fasting. Data shown as means  $\pm$  S.E., \* $p < 0.05$ , where indicated n = 4-5.
